# Supplementary material for: Vegetation dynamics in Alpine glacier forelands tackled from space
Source: PubMed Central journal article supplement (PMC6763459; doi:10.1038/s41598-019-50273-2), 2019-09-26
Supplement: 41598_2019_50273_MOESM1_ESM.pdf [file 41598_2019_50273_MOESM1_ESM.pdf]

## Supplementary material

### Vegetation dynamics in Alpine glacier forelands tackled from space

Andrea Fischer (1)\*, Thomas Fickert (2), Gabriele Schwaizer (3), Gernot Patzelt (4), Günther Groß (5)

(1) Institute for Interdisciplinary Mountain Research, Austrian Academy of Sciences,

Technikerstr. 21a, 6020 Innsbruck, Austria.

(2) Faculty of Arts and Humanities, University of Passau, Innstraße 40, 94032 Passau, Germany.

(3) ENVEO IT GmbH, Fürstenweg 176, 6020 Innsbruck, Austria.

(4) Patscher Strasse 20, 6080 Igls

(5) Oberrain 205, 6721 Thüringerberg

\* Correspondence should be addressed to A.F. (email: [andrea.fischer@oeaw.ac.at](mailto:andrea.fischer@oeaw.ac.at))

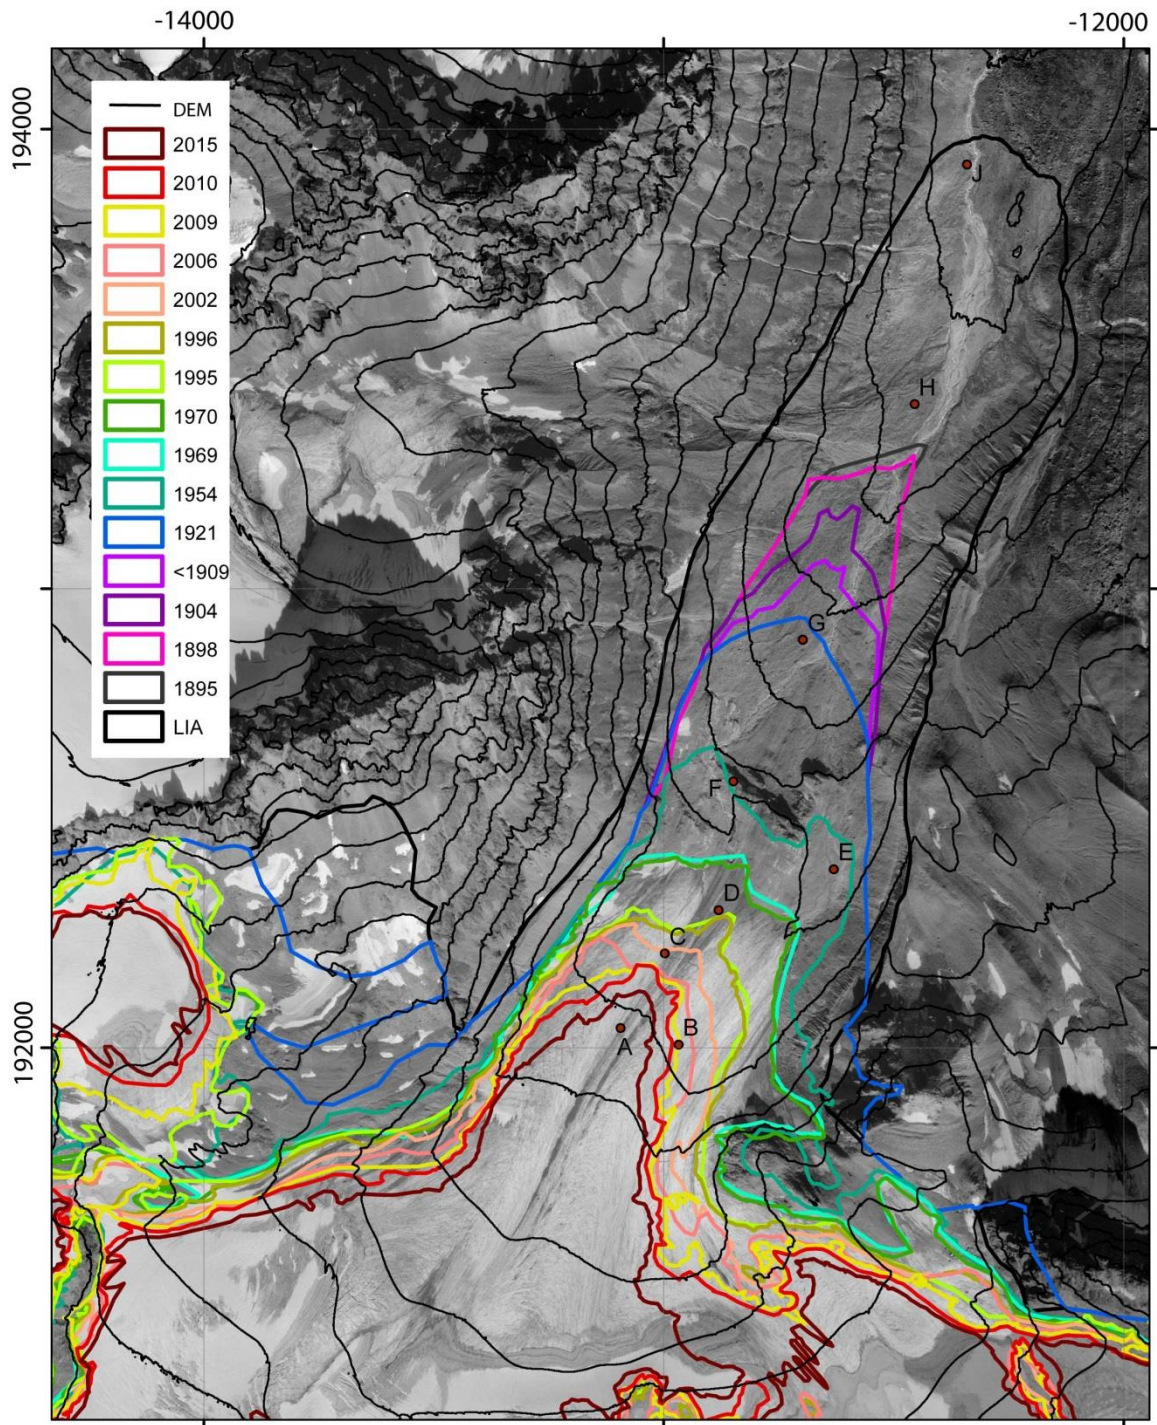

Fig. S1: Extent of Jamtalferner in various years between LIA maximum and 2015, as well as contour lines (DEM of 2006) superimposed on an orthophoto from 1970 (source: Land Tirol - data.tirol.gv.at CC BY 4.0).

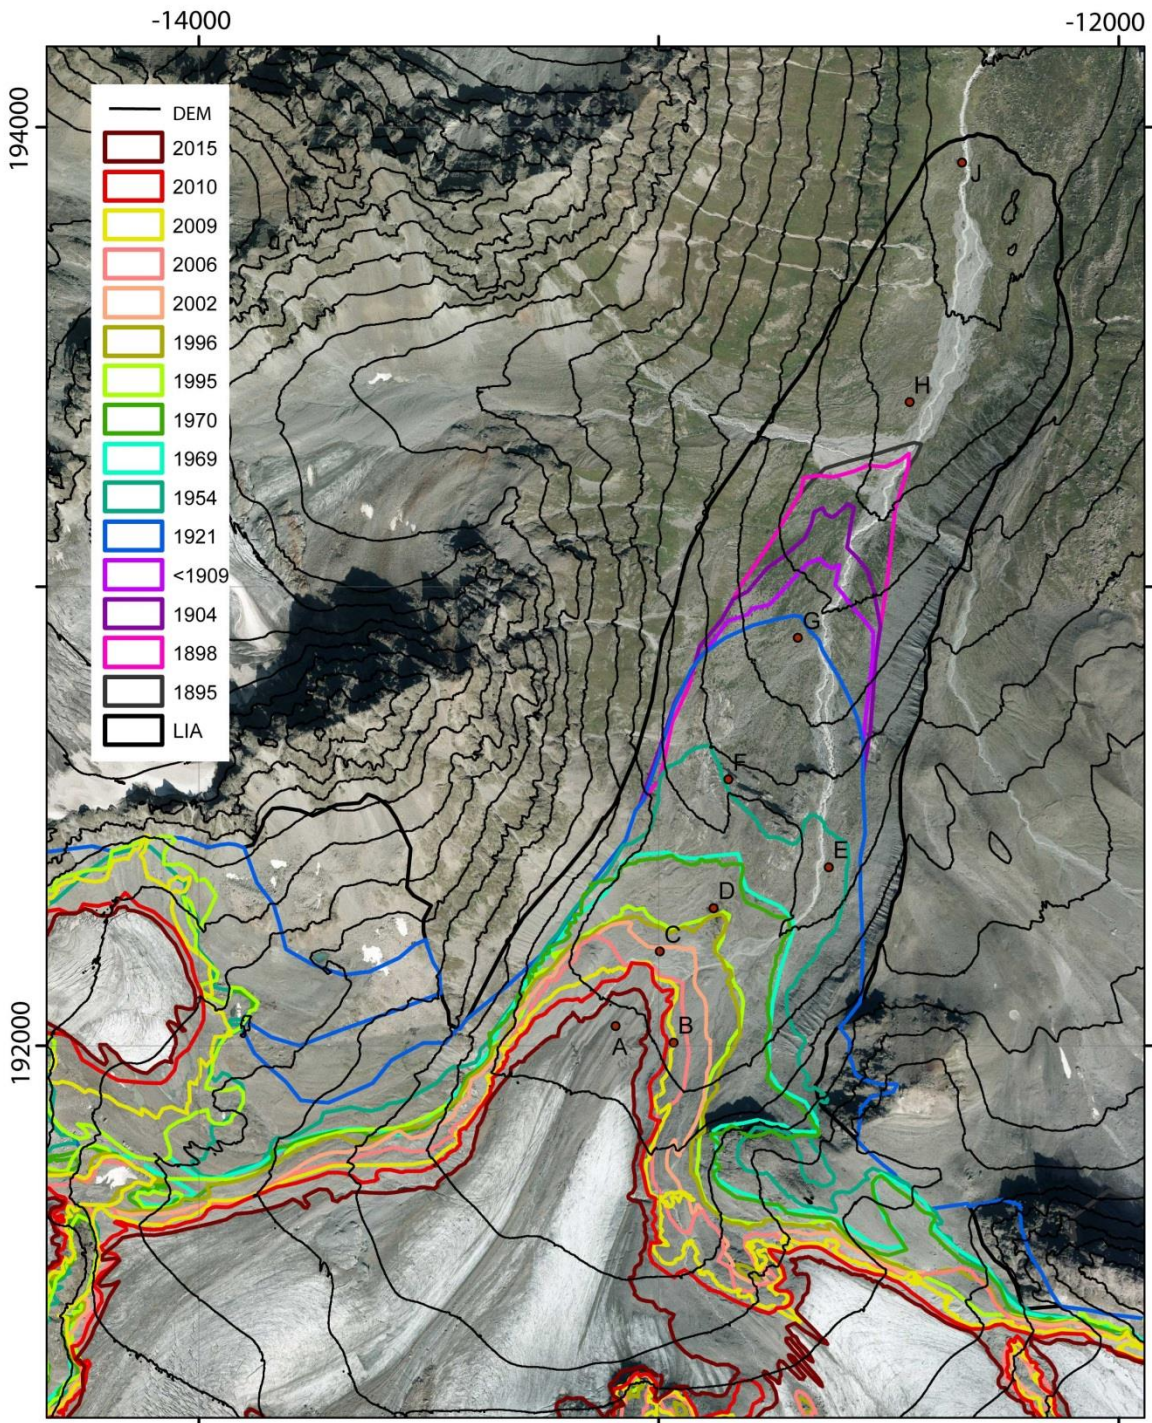

Fig. S2: Extent of Jamtalferner in various years between LIA maximum and 2015, as well as contour lines (DEM of 2006) superimposed on an orthophoto from 2015 (source: Land Tirol - data.tirol.gv.at CC BY 4.0).

Table S1: Monthly, seasonal and annual means of air temperature and precipitation sums at the Galtür station (1587 m, 1951-2000) and precipitation at the rain gauge at the tongue of Jamtalferner (2400 m, 1989-2017), provided by the Hydrographical Service of the Federal Government of Tyrol. % of Galtür: percentage of precipitation at the glacier tongue compared to precipitation measured in Galtür. See also the insert in Figure 1.

|                     |     |      |      |      |      |      |     |     |     |     |      |     |         |         |      |
|---------------------|-----|------|------|------|------|------|-----|-----|-----|-----|------|-----|---------|---------|------|
| Galtür              | Oct | Nov  | Dec  | Jan  | Feb  | Mar  | Apr | May | Jun | Jul | Aug  | Sep | May-Sep | Oct-Apr | year |
| Temperature in °C   | 3.9 | -1.7 | -5.0 | -5.9 | -5.0 | -2.2 | 1.3 | 6.3 | 9.5 | 12  | 11.2 | 8.2 | 9.4     | -2.1    | 2.7  |
| Precipitation in mm | 60  | 64   | 62   | 66   | 57   | 60   | 54  | 81  | 123 | 147 | 142  | 97  | 590     | 423     | 1013 |
|                     |     |      |      |      |      |      |     |     |     |     |      |     |         |         |      |
| Jamtalferner        | Oct | Nov  | Dec  | Jan  | Feb  | Mar  | Apr | May | Jun | Jul | Aug  | Sep | May-Sep | Oct-Apr | year |
| Precipitation in mm | 102 | 97   | 98   | 94   | 93   | 93   | 90  | 120 | 183 | 195 | 205  | 137 | 840     | 667     | 1507 |
| % of Galtür         | 170 | 151  | 159  | 142  | 163  | 155  | 167 | 148 | 149 | 133 | 144  | 141 | 142     | 158     | 149  |

Table S2. Fossil trees (*Pinus cembra*) found close to the Jamtal hut with lab code and results.

| sample ID | laboratory ID | altitude | <sup>14</sup> C age BP | calibrated age BC (2σ) |
|-----------|---------------|----------|------------------------|------------------------|
| FT-1      | VRI-1990      | 2290     | 4630±60                | 3631-3116              |
| FT-2      | VRI-1991      | 2240     | 4550±60                | 3500-3020              |



Table S4: NDVI 2016, as well as means and changes for two periods (1985-1991, 2009) at the sample sites with altitude. \* glacier area at that date.

| Ice-free years | Sample | Altitude | NDVI mean 1985-1991 | NDVI mean 2009 | NDVI 85_91-2009 | NDVI 2016 |
|----------------|--------|----------|---------------------|----------------|-----------------|-----------|
| 1              | A      | 2464     | *                   | *              | 0.09            | -0.03     |
| 7              | B      | 2430     | *                   | *              | 0.12            | 0.00      |
| 15             | C      | 2409     | *                   | 0.03           | 0.08            | 0.11      |
| 25             | D      | 2405     | 0.01                | 0.13           | 0.11            | 0.21      |
| 55             | E      | 2389     | 0.16                | 0.29           | 0.13            | 0.40      |
| 70             | F      | 2384     | 0.16                | 0.29           | 0.13            | 0.40      |
| 90             | G      | 2271     | 0.27                | 0.29           | 0.02            | 0.35      |
| 120            | H      | 2177     | 0.32                | 0.40           | 0.08            | 0.46      |
| 150            | J      | 2123     | 0.36                | 0.43           | 0.07            | 0.50      |
| average        |        |          | 0.11                | 0.20           | 0.09            | 0.27      |

Table S5: Maps and DEMs of Jamtalferner with source and date. GI1,2,3: part of the glacier inventory. BW: Black and white images. \* The LIA maximum state has been reported for 1864, based on a conversation of Greim with Gottlieb Lorenz (1844-1911), who was a shepherd in Jamtal in his 20s. This oral reported date is not consistent with other literature, for example, Richter's observation about the contact of Jamtalferner and Totenfeldferner and older maps. Therefore, this date must be considered uncertain. TIRIS: orthophotos of surveys of the federal government of Tyrol.

| Year          | Type        | Source | Remarks  |
|---------------|-------------|--------|----------|
| 2015          | orthophoto  | TIRIS  |          |
| 2010          | orthophoto  | TIRIS  |          |
| 2006          | LiDAR       | TIRIS  | GI3      |
| 2002          | orthophoto  | TIRIS  |          |
| 2002          | orthophoto  |        | BW GI2   |
| 1996          | orthophoto  |        | GI2      |
| 2009          | orthophoto  | TIRIS  |          |
| 1995          | orthophoto  | TIRIS  | BW       |
| 1970          | orthophoto  | TIRIS  | BW       |
| 1969          | orthophoto  |        | BW GI1   |
| 1954          | orthophoto  | TIRIS  | BW       |
| 1921          | map         | [20]   | 1:15,000 |
| not specified | map         | [35]   | 1:25,000 |
| 1909          | map         | [20]   | 1:15,000 |
| 1904          | map         | [20]   | 1:15,000 |
| 1898          | map         | [20]   | 1:15,000 |
| ?             | map         | [40]   | 1:50,000 |
| 1895/1897     | map         | [25]   | 1:10,000 |
| 1888          | point       |        |          |
| 1870          | point       |        |          |
|               | map         | [34]   | 1:50,000 |
| ~1864*        | LIA moraine | [20]   | GI LIA   |

Table S6: List of remote-sensing images used in the study.

| Satellite sensor | Date     | Path/Row |
|------------------|----------|----------|
| Landsat 5 TM     | 19850813 | 193/027  |
| Landsat 5 TM     | 19900802 | 194/027  |
| Landsat 5 TM     | 19900811 | 193/027  |
| Landsat 5 TM     | 19910830 | 193/027  |
| Landsat 5 TM     | 19980808 | 194/027  |
| Landsat 5 TM     | 20040801 | 193/027  |
| Landsat 5 TM     | 20060823 | 193/027  |
| Landsat 5 TM     | 20070826 | 193/028  |
| Landsat 5 TM     | 20090806 | 194/027  |
| Landsat 5 TM     | 20090815 | 193/027  |
| Landsat 5 TM     | 20090831 | 193/028  |
| Landsat 8 OLI    | 20130801 | 194/027  |
| Landsat 8 OLI    | 20150731 | 193/027  |
| Landsat 8 OLI    | 20160825 | 194/027  |

Table S7: Spectral bands used for this study with wavelength range and spatial resolution for the sensors in Table 4.

|                  | Red                   |                | NIR                   |                |
|------------------|-----------------------|----------------|-----------------------|----------------|
| Satellite sensor | wavelength range (nm) | Resolution (m) | wavelength range (nm) | Resolution (m) |
| Landsat 5 TM     | 630-690               | 30             | 760-900               | 30             |
| Landsat 8 OLI    | 636-673               | 30             | 851-879               | 30             |
